# Supplementary material
Source: publisher figshare collection journal article supplement (https://gsajournals.figshare.com/ndownloader/files/22817549)
Supplement: Supplementary file 1 [file 22817549]

## Supplements

### **Data preparation and quality control**

Both datasets were combined based on reference genome V2 positions into the hapmap format. For SNPs where the opposite strand was targeted by the two array platforms the corresponding alleles were converted to their complementary basepair and compared to the landrace population reference. We removed insertions, unmapable SNPs (chr0 and duplicated SNPs), non-polymorphic sites, and SNPs with quality classes 'off-target variant' and 'call rate below threshold'. We further removed SNPs that violated the Hardy-Weinberg equilibrium ( $\chi^2, mid - p < 0.05$ ) in at least one LR accession from all LRs using plink 1.9 (Chang *et al.* (2015), see Table S2). A vcf file for the whole dataset was constructed using TASSEL 5 (Bradbury *et al.* 2007). Accession filtered datasets were written using custom R scripts with various packages.

### **Imputation allows haplotype analysis**

In our study we relied on published genotyping data based on two different genotyping arrays (Ganal *et al.* 2011; Unterseer *et al.* 2014). While the data was highly consistent and reconstructed the population structure correctly (Figure 1A and S5), these platforms come with several limitations, reducing the ability to detect rare and potentially deleterious alleles and reductions of diversity. By imputing the DH dataset we combined phase information of both the LR populations and the DH lines and were able to increase the SNP density for the DH data. The imputed dataset enabled us to identify major reductions of mean haplotype diversity in polymorphic windows and large regions of complete fixation in the DH populations. The extent of this loss of diversity could only be detected using imputed genotypes. While imputation came with an error rate of 10.6 % to 15.9 %, we were able to increase the number of sites in the DH lines from 37 thousand to over 530 thousand. Imputational error rates depend highly on the reference panel used, MAF, SNP density and chromosome sample size; error rates in the literature range from 1 % to 15 % (Browning and Browning 2009; Howie *et al.* 2009; Khatkar *et al.* 2012). We show that the estimated imputational error rate is randomly distributed across the genome (Figure S2) and the correlation with the genetic distance of neighboring SNPs is low (Figure S1). Furthermore, the mean haplotype diversity of the unimputed 50k dataset (Figure S11) showed significant reductions of DH diversity compared to the LR in every accession and we found corresponding outliers using imputed and unimputed data (e.g., chromosome 3, near centromere). Additionally, we reanalyzed the fate haplotypes of the unimputed 50k and used windows based on LD (window size 0.2 cM). This resulted in a reduction of fixed major haplotypes, but in similar amounts of lost major haplotypes confirm our findings of the 600k data run. Hence, we conclude that the trade-off between marker density and imputation error is justified for the haplotype analysis, and the information gain associated with imputation overcomes the loss in statistical power due to undetected genetic diversity in the DH. While genotyping arrays have high genotyping accuracy for called SNPs, future studies should use genome-wide sequencing to avoid imputation and ascertainment issues. This would allow harnessing the full potential of DH lines from landraces to study the causes of inbreeding depression in maize.

**Table S1** Sample sizes for DH and LR

| Population | DH  | LR  | Sum |
|------------|-----|-----|-----|
| BU         | 36  | 22  | 58  |
| GB         | 59  | 46  | 105 |
| RT         | 44  | 23  | 67  |
| SC         | 58  | 23  | 81  |
| SF         | 69  | 23  | 92  |
| Sum        | 266 | 137 | 403 |

**Table S2** Number of SNPs removed during quality control

| stage                                 | removed      |
|---------------------------------------|--------------|
| duplicated SNPs                       | 389          |
| Chromosome 0                          | 310          |
| non polymorphic sites                 | 77798        |
| Insertions                            | 107          |
| quality tag: CallRateThresh           | 846          |
| quality tag: off-target variant (OTV) | 2747         |
| violated HW                           | 814          |
| <b>SUM removed SNPs</b>               | <b>83011</b> |

**Table S3** Datasets used in this study

| Dataset | Populations                | SNPs    | Individuals |
|---------|----------------------------|---------|-------------|
| 50k DH  | BU, GB, RT, SC, SF         | 37,967  | 266         |
| 50k LR  | BU, GB, RT, SC, SF         | 37,967  | 137         |
| 600k DH | BU, GB, RT, SC, SF         | 533,190 | 266         |
| 600k LR | BU, GB, RT, SC, SF         | 533,190 | 137         |
| GWAS DH | CG, EF, GB, RT, SF, SM, WA | 37,884  | 404         |

**Table S4** Number of outlier SNPs identified in the aSFS test

| Overlap    | BU      | GB     | RT      | SC     | SF     | SUM unique   |
|------------|---------|--------|---------|--------|--------|--------------|
| 1          | 2516    | 849    | 4301    | 1193   | 446    | 9305         |
| 2          | 915     | 566    | 1176    | 695    | 402    | 1877         |
| 3          | 252     | 340    | 320     | 372    | 333    | 539          |
| 4          | 161     | 276    | 260     | 290    | 281    | 317          |
| 5          | 307     | 307    | 307     | 307    | 307    | 307          |
|            |         |        |         |        |        | <b>12345</b> |
| <b>SUM</b> | 4151    | 2338   | 6364    | 2857   | 1769   | <b>17479</b> |
| Outlier %  | 11.15 % | 6.16 % | 16.78 % | 7.53 % | 4.66 % |              |

**Table S5** Fate of most common haplotypes in a total of 34,833 50kb windows in the 600k data.

| Accession | fixed | lost | segregating | Sum (windows) | Sum (haplotypes) | fixed % | lost % | segregating % |
|-----------|-------|------|-------------|---------------|------------------|---------|--------|---------------|
| BU        | 3774  | 6723 | 13186       | 23683         | 209982           | 15.94   | 28.39  | 55.68         |
| GB        | 3222  | 3917 | 16684       | 23823         | 244164           | 13.52   | 16.44  | 70.03         |
| RT        | 5999  | 3682 | 12339       | 22020         | 113418           | 27.24   | 16.72  | 56.04         |
| SC        | 5199  | 5138 | 12993       | 23330         | 160030           | 22.28   | 22.02  | 55.69         |
| SF        | 4806  | 6106 | 12837       | 23749         | 194009           | 20.24   | 25.71  | 54.05         |

**Table S6** ANOVA tables of the outlier characterization using GWAS effect sizes. The term 'outlier' refers to the SNPs classified as 'outlier' or 'non-outlier' in the aSFS.

| Trait            | Term                  | df     | SumSq    | MeanSq   | F-value | p-value   |
|------------------|-----------------------|--------|----------|----------|---------|-----------|
| shoot vigor      | outlier               | 1      | 1.65e-07 | 1.65e-07 | 1.57    | 0.21      |
|                  | frequency bin         | 9      | 4.89e-05 | 5.44e-06 | 51.8    | 1.45e-94  |
|                  | outlier:frequency bin | 9      | 1.34e-05 | 1.48e-06 | 14.2    | 4.26e-23  |
|                  | Residuals             | 113000 | 0.0118   | 1.05e-07 |         |           |
| female flowering | outlier               | 1      | 9.94e-08 | 9.94e-08 | 0.0264  | 0.871     |
|                  | frequency bin         | 9      | 0.00197  | 0.000218 | 58.1    | 1.35e-106 |
|                  | outlier:frequency bin | 9      | 0.000572 | 6.35e-05 | 16.9    | 3.48e-28  |
|                  | Residuals             | 113000 | 0.424    | 3.76e-06 |         |           |
| fusarium         | outlier               | 1      | 1.11e-07 | 1.11e-07 | 0.0798  | 0.778     |
|                  | frequency bin         | 9      | 0.000266 | 2.95e-05 | 21.1    | 4.13e-36  |
|                  | outlier:frequency bin | 9      | 3.61e-05 | 4.01e-06 | 2.87    | 0.00217   |
|                  | Residuals             | 113000 | 0.157    | 1.4e-06  |         |           |
| grain yield      | outlier               | 1      | 5.07e-05 | 5.07e-05 | 1.48    | 0.224     |
|                  | frequency bin         | 9      | 0.0097   | 0.00108  | 31.5    | 1.1e-55   |
|                  | outlier:frequency bin | 9      | 0.00344  | 0.000382 | 11.2    | 1.31e-17  |
|                  | Residuals             | 113000 | 3.86     | 3.42e-05 |         |           |
| oil content      | outlier               | 1      | 9.52e-06 | 9.52e-06 | 23.7    | 1.12e-06  |
|                  | frequency bin         | 9      | 2.29e-05 | 2.55e-06 | 6.35    | 4.75e-09  |
|                  | outlier:frequency bin | 9      | 3.49e-05 | 3.87e-06 | 9.65    | 6.95e-15  |
|                  | Residuals             | 113000 | 0.0452   | 4.01e-07 |         |           |

(continued next page)

**Table S6** (continued) ANOVA tables of the outlier characterization using GWAS effect sizes.

| Trait           | Term                  | df     | SumSq    | MeanSq   | F-value | p-value   |
|-----------------|-----------------------|--------|----------|----------|---------|-----------|
| plant height    | outlier               | 1      | 0.000502 | 0.000502 | 10.5    | 0.00119   |
|                 | frequency bin         | 9      | 0.033    | 0.00367  | 76.8    | 1.44e-142 |
|                 | outlier:frequency bin | 9      | 0.0124   | 0.00138  | 28.9    | 9.98e-51  |
|                 | Residuals             | 113000 | 5.38     | 4.78e-05 |         |           |
| protein content | outlier               | 1      | 8.13e-07 | 8.13e-07 | 2.36    | 0.124     |
|                 | frequency bin         | 9      | 0.000184 | 2.04e-05 | 59.3    | 5.19e-109 |
|                 | outlier:frequency bin | 9      | 3.04e-05 | 3.37e-06 | 9.8     | 3.76e-15  |
|                 | Residuals             | 113000 | 0.0388   | 3.44e-07 |         |           |

### Additional figures

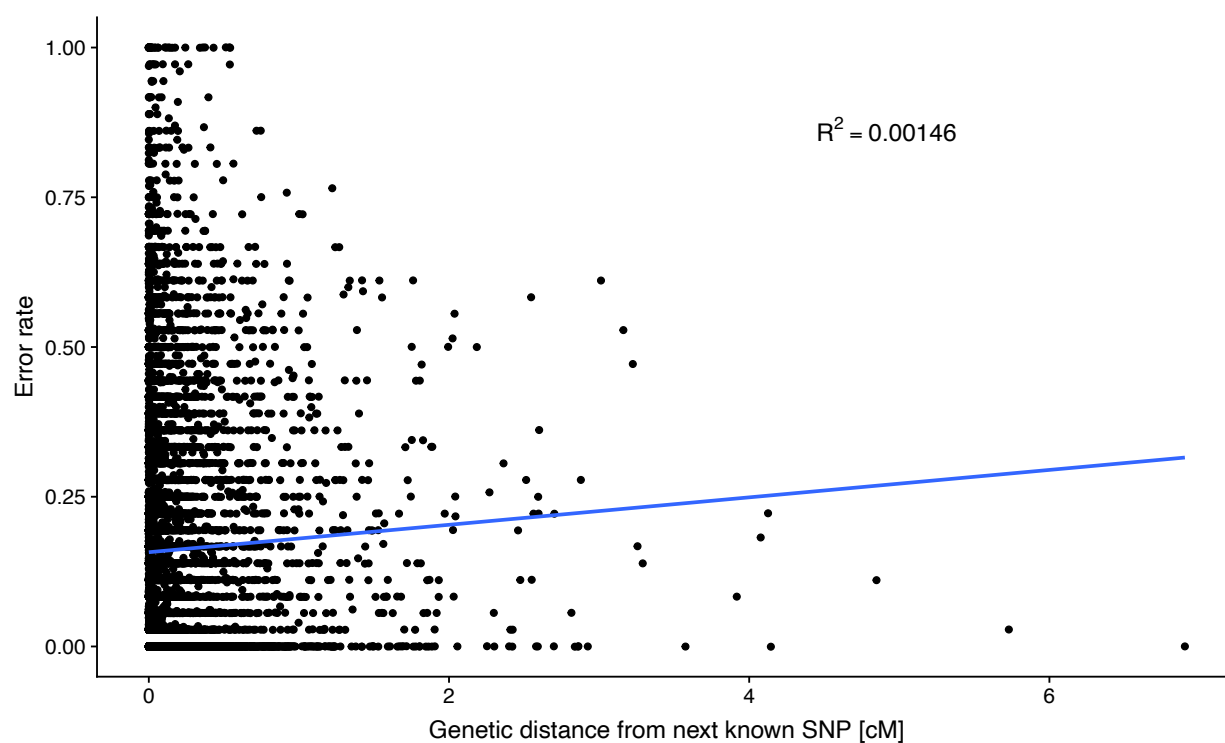

**Figure S1** Correlation of marker density and imputation error rate shows low  $R^2$ .



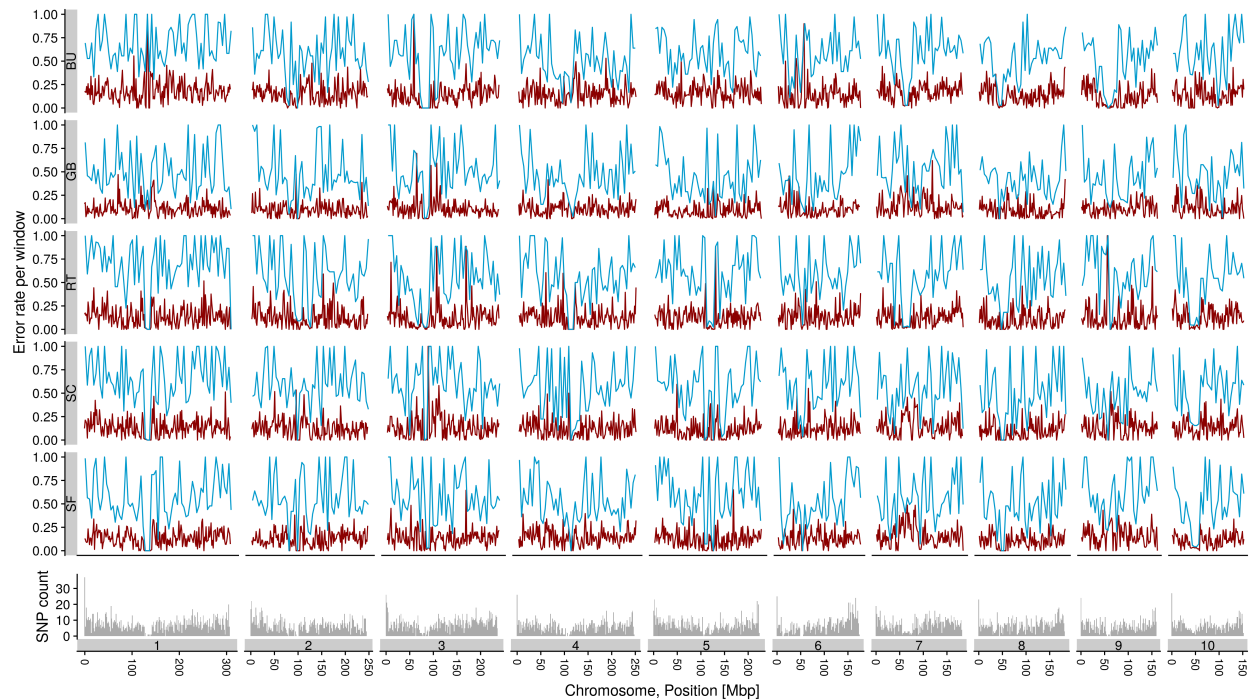

**Figure S2** Imputation error rate for DH lines in five accessions. 10,000 known random SNPs were dropped and imputed to compute the error rate represented by mean error in 1.5 Mbp window (red line) and maximum error in 4.5 Mbp window (blue line). SNP density of the Illumina chip in 1.5 Mbp windows shown in bottom panel.

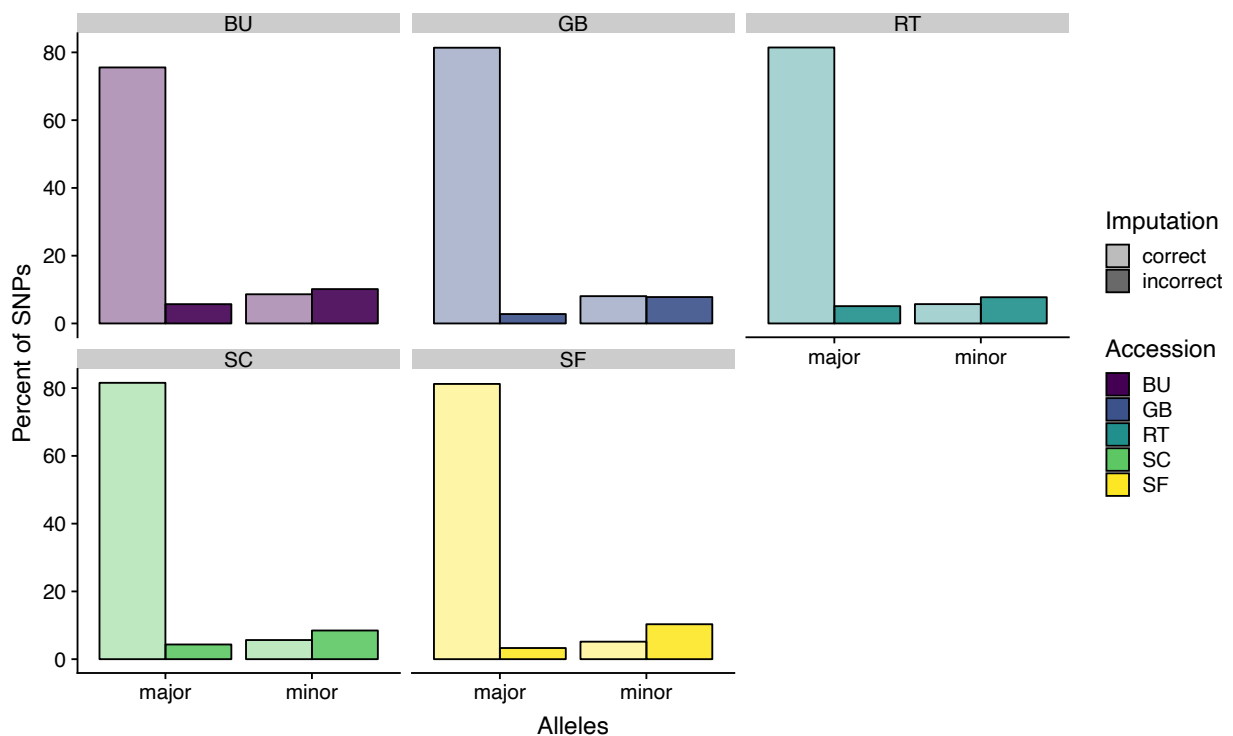

**Figure S3** Percentages of correctly and incorrectly imputed SNPs in the imputation test runs.

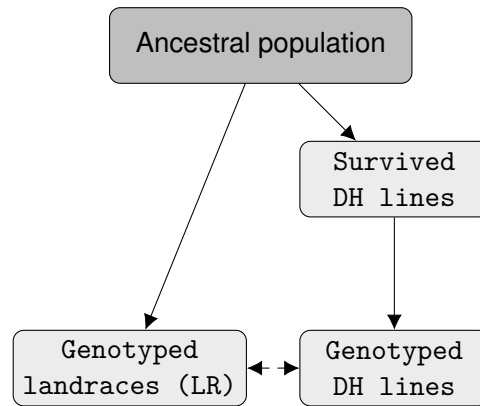

**Figure S4** Assumed, simplified sampling structure for DH and LR we used to calculate ancestral frequencies and  $p$ -values.

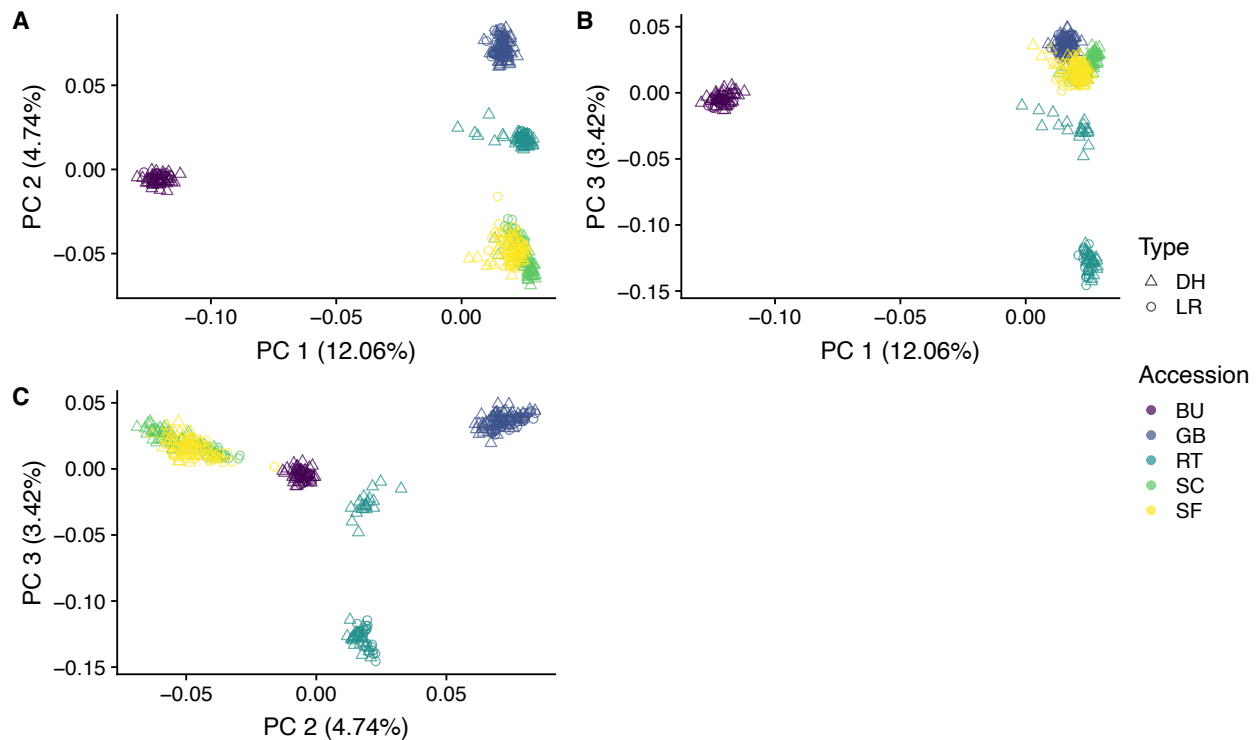

**Figure S5** Principal component analysis for DH and LR of the 50k dataset, plot of principal component 1 and 2 (A) shows common clusters for LR and DH in respective accessions. However, principal component 3 separates the DH set of accession RT (B, C).

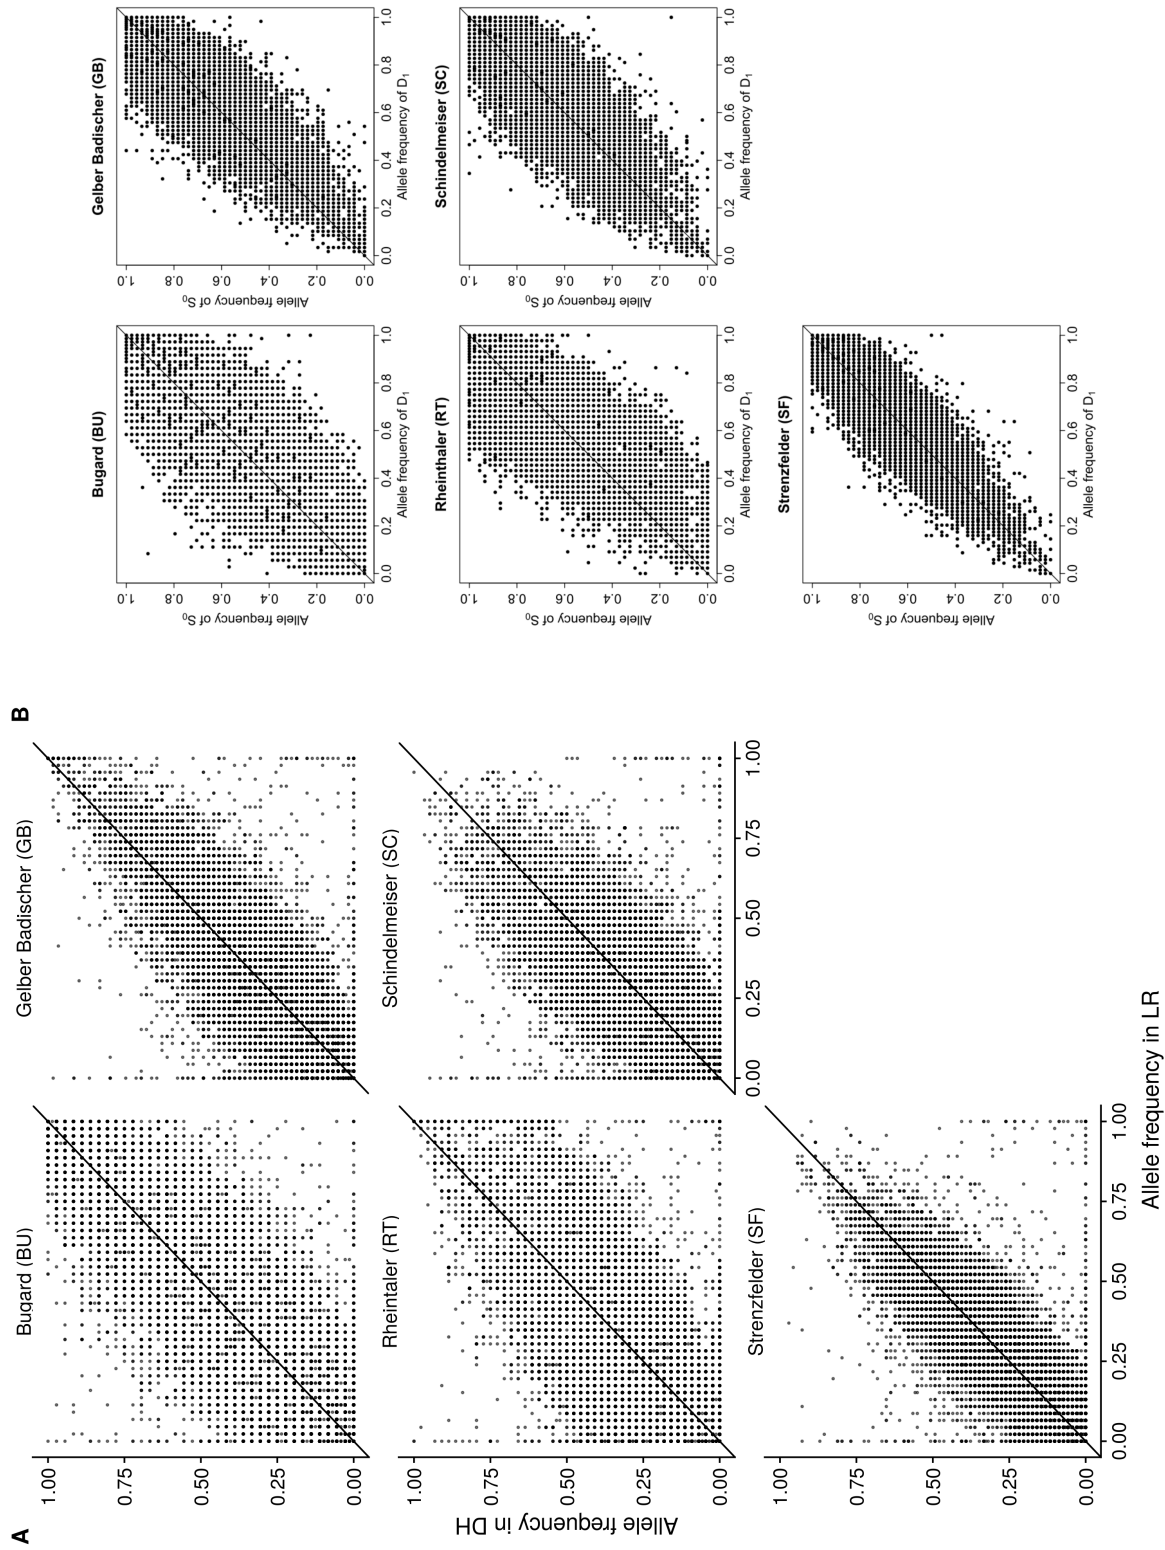

**Figure S6** Comparison of joint frequency spectra with published data. (A) Landrace population and DH line alternative allele frequencies estimated from filtered supplementary dataset from [Melchinger et al. \(2017\)](#). (B) For comparison published figure ([Melchinger et al. 2017](#)) with reference allele frequencies depicted on the axes.

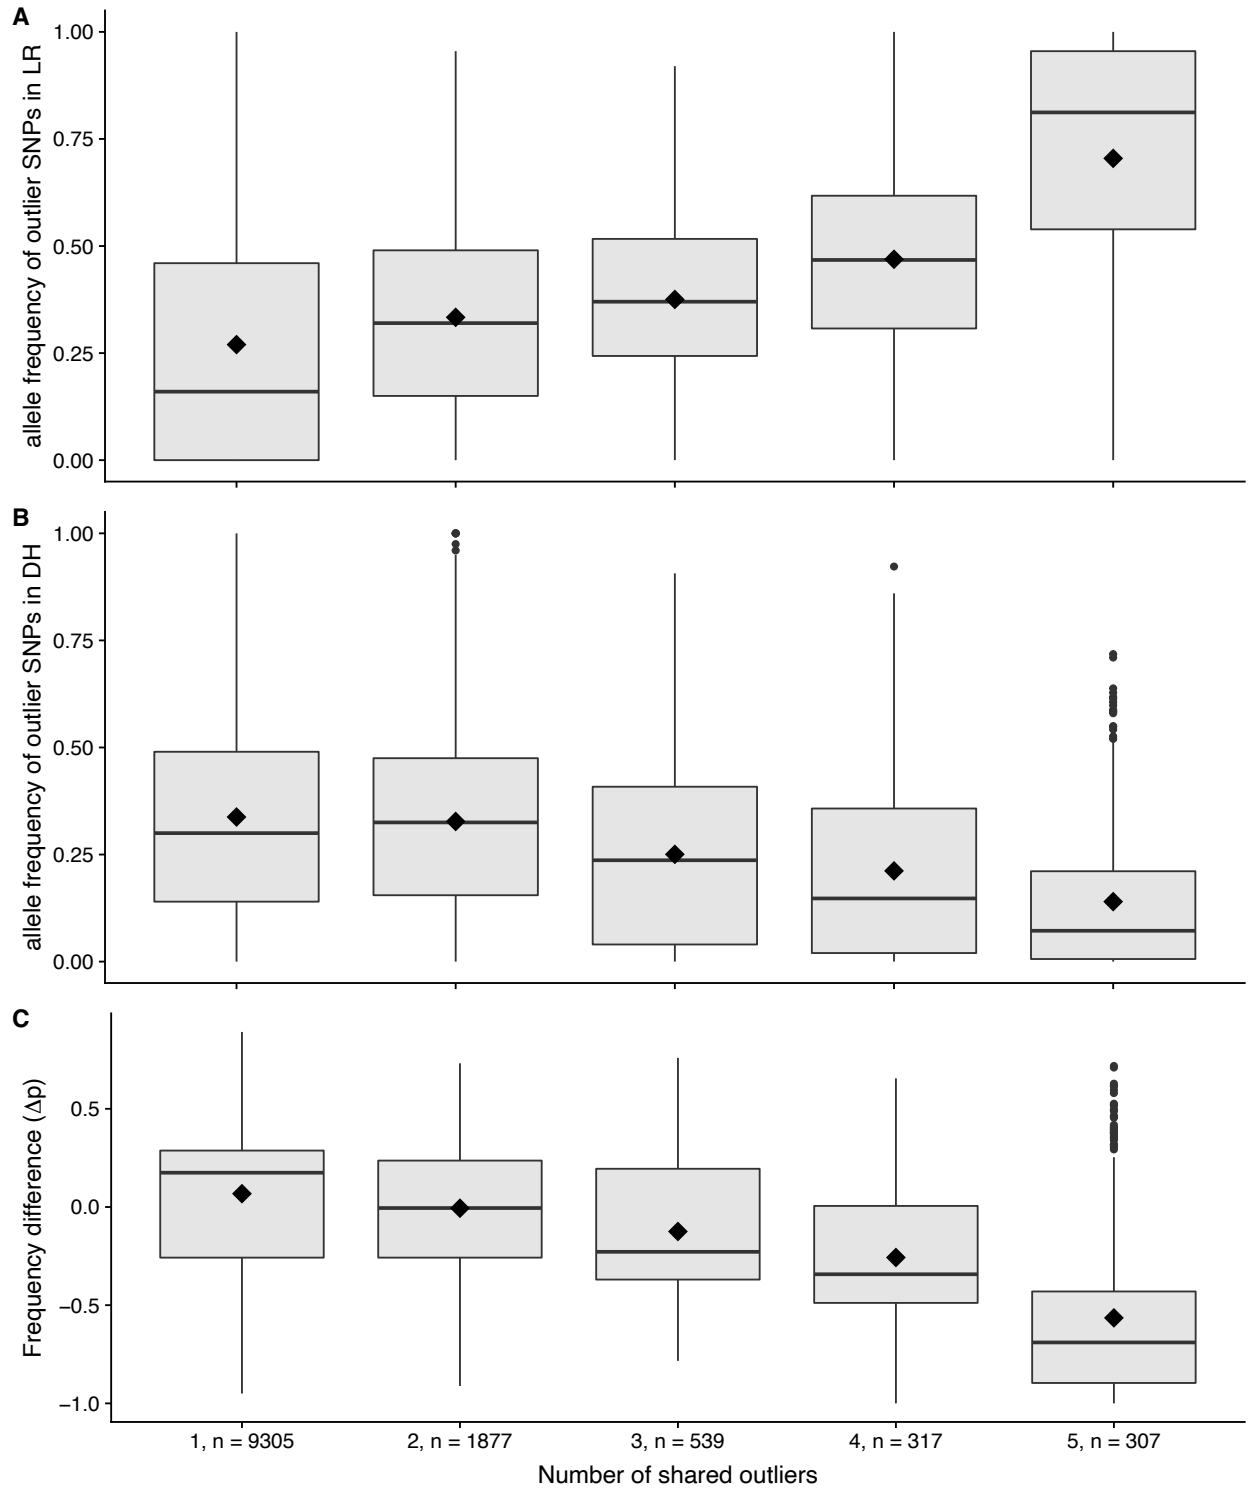

**Figure S7** Mean allele frequencies in LR populations (A) and DH lines (B) calculated per number of shared outlier alleles. Outlier alleles, that are shared more often across populations are more likely to have low frequencies and to be lost, while unique outliers change only little in frequency (C). Numbers on x axis ticks correspond to number of shares and number of alleles in this column.

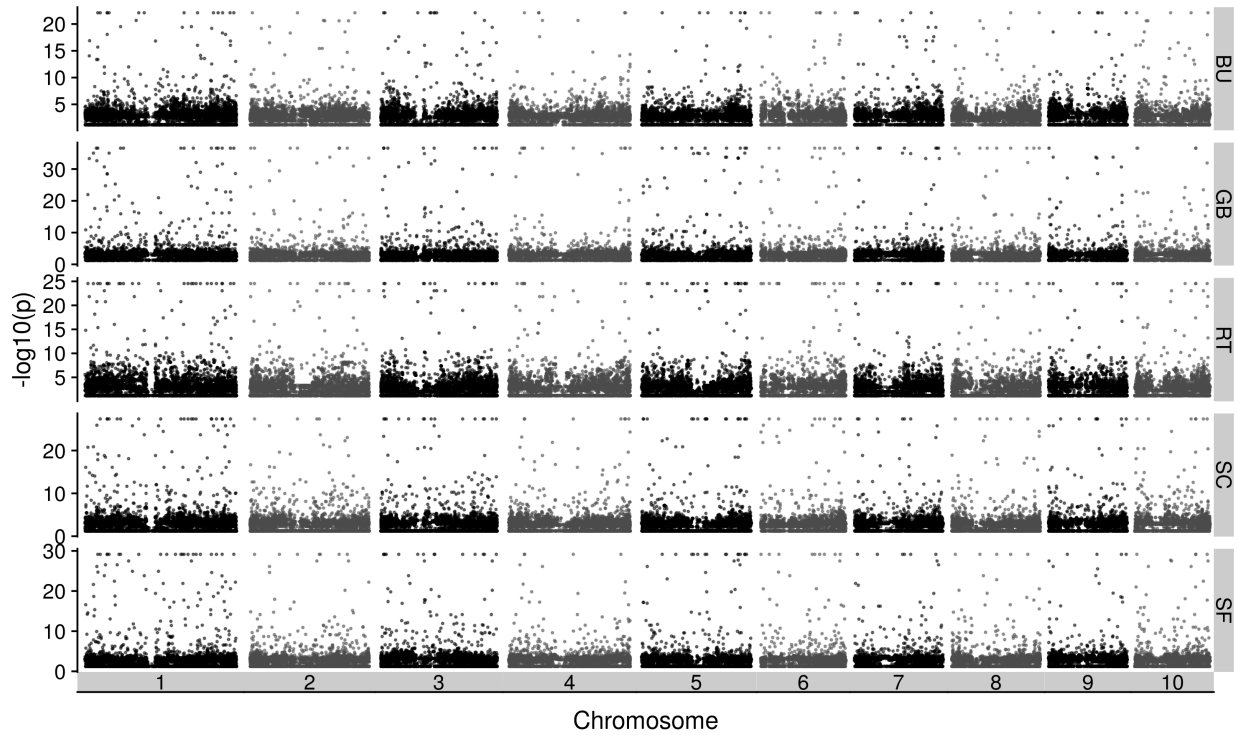

**Figure S8** Joint probabilities of DH and LR allele frequency for all accessions and chromosomes.

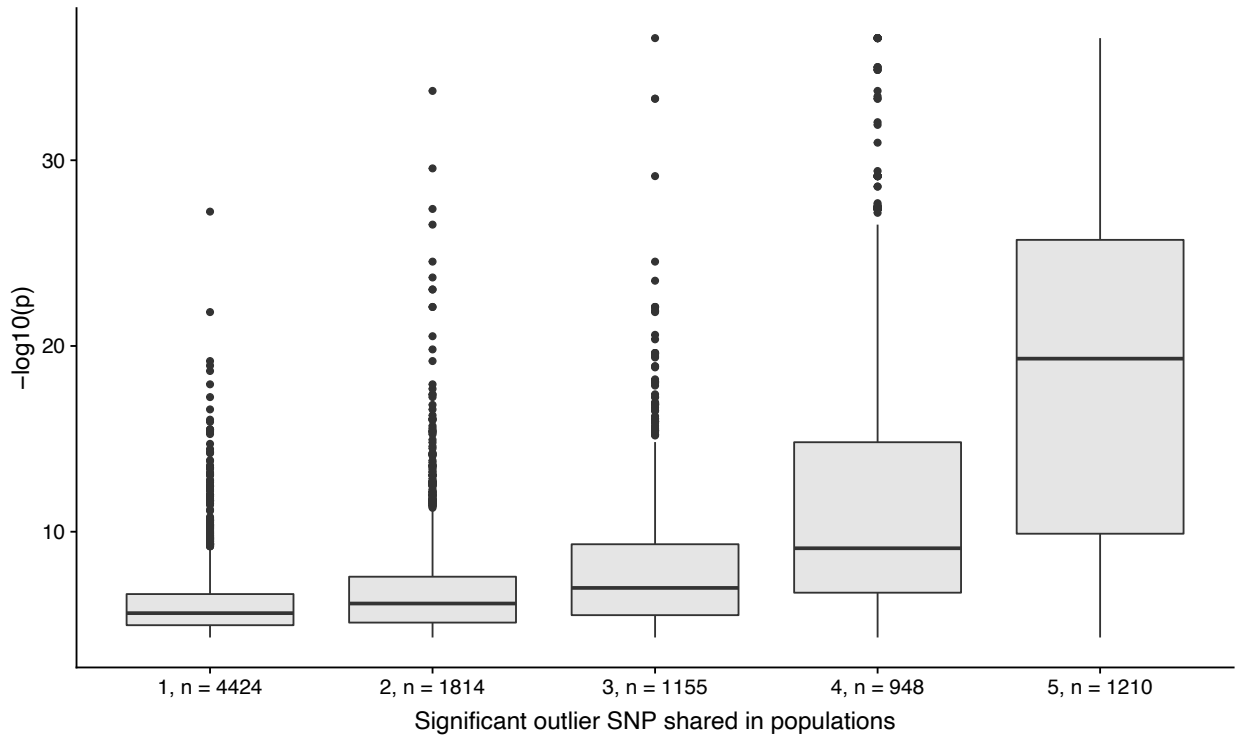

**Figure S9** Shared significant  $-\log_{10}(p)$  values of the probability test and their overlaps among accessions show that high values are found primarily in frequently shared outlier SNPs. Numbers on x-axis correspond to the shared populations and number of outlier-SNPs in this class.

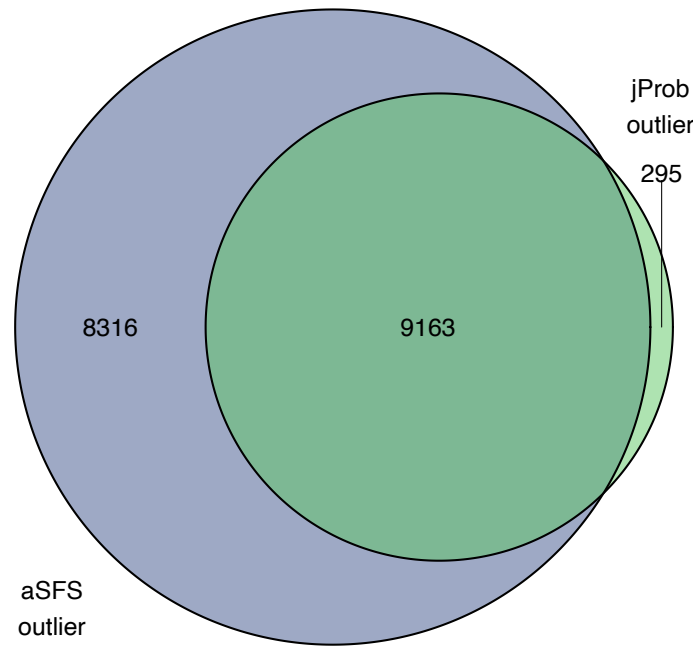

**Figure S10** Shared outliers of aSFS and joint probability (jProb) tests, numbers in circles refer to summarized number of outlier in category.

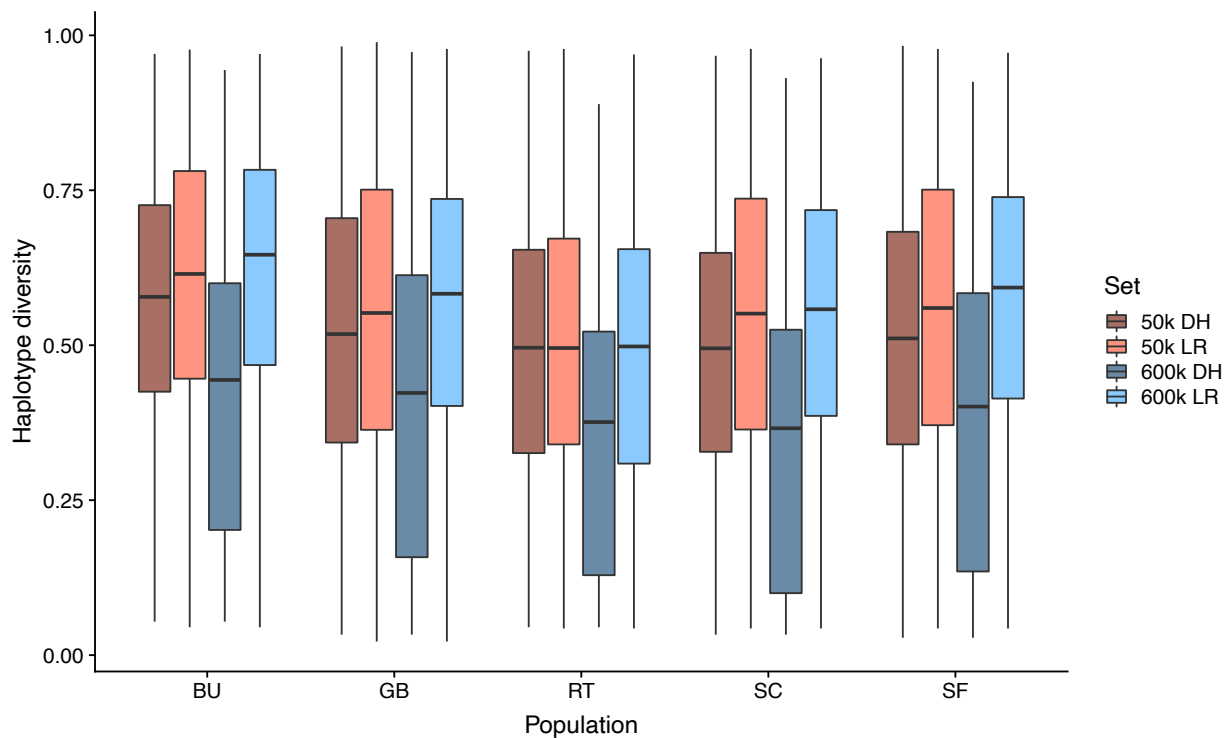

**Figure S11** Comparison of haplotype diversity in 50k and 600k datasets in 50kb windows with more than one haplotype shows increase in haplotype diversity in the 600k LR dataset compared to the 600k DH, as well as a reduction of 50k LR compared to 600k DH. This difference is not visible in the DH, indicating that some diversity is missed during the imputation.



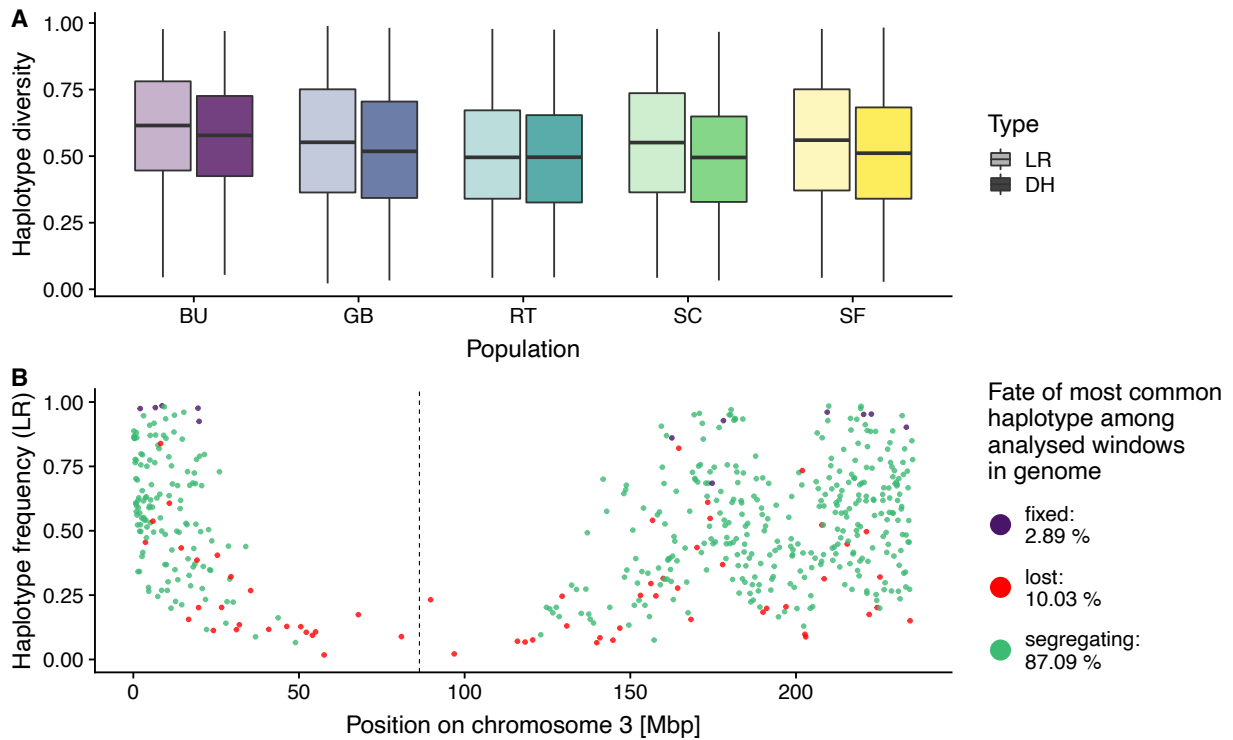

**Figure S12** Similar to Figure 3 we analysed haplotypes of the 50k data using windows based on genetic distance (0.2 cM windows). (A) The reduction in haplotype diversity is less pronounced due to higher ascertainment bias and lower SNP density of the 50k chip and imputational error of the 600k DH. (B) Fixed major haplotypes occur very rarely, lost haplotype, however, quite frequently. Reduced SNP density and differences in ascertainment panel sizes between 50k and 600k arrays remove the signal of the putative inversion.

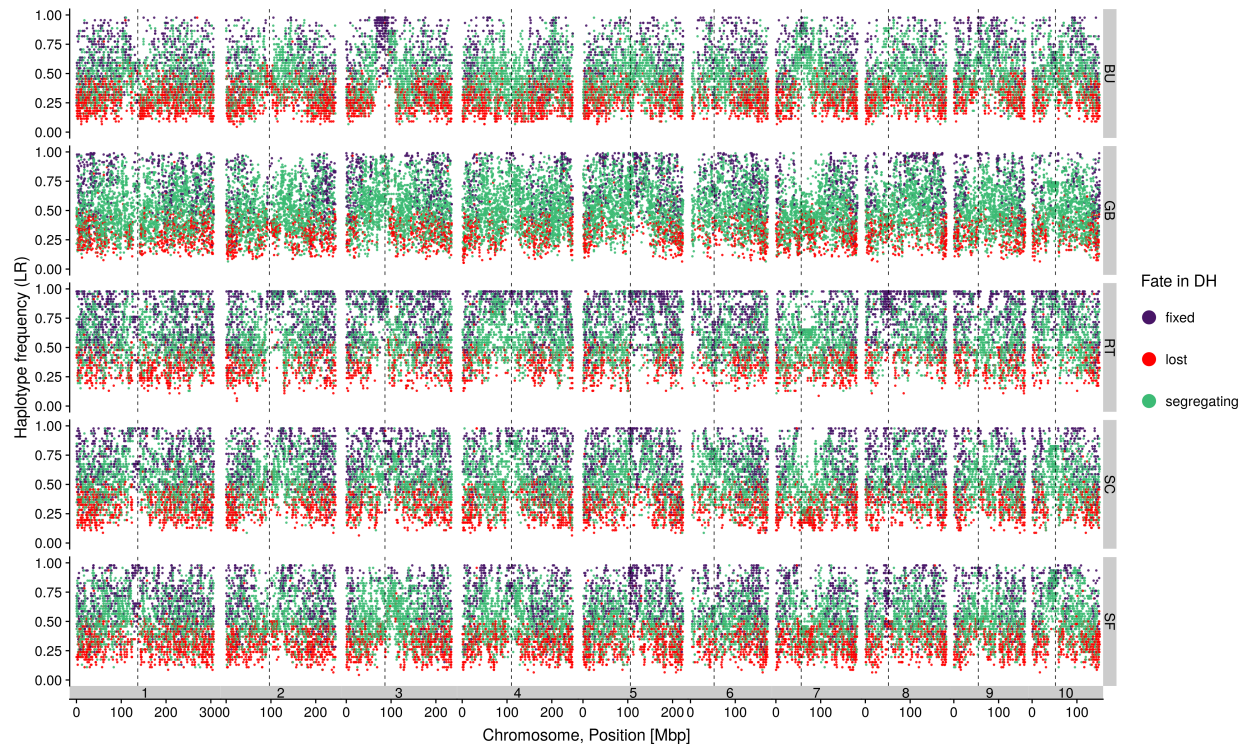

**Figure S13** Fate of the most common haplotypes in all accessions. Centromeres are shown as dashed lines.

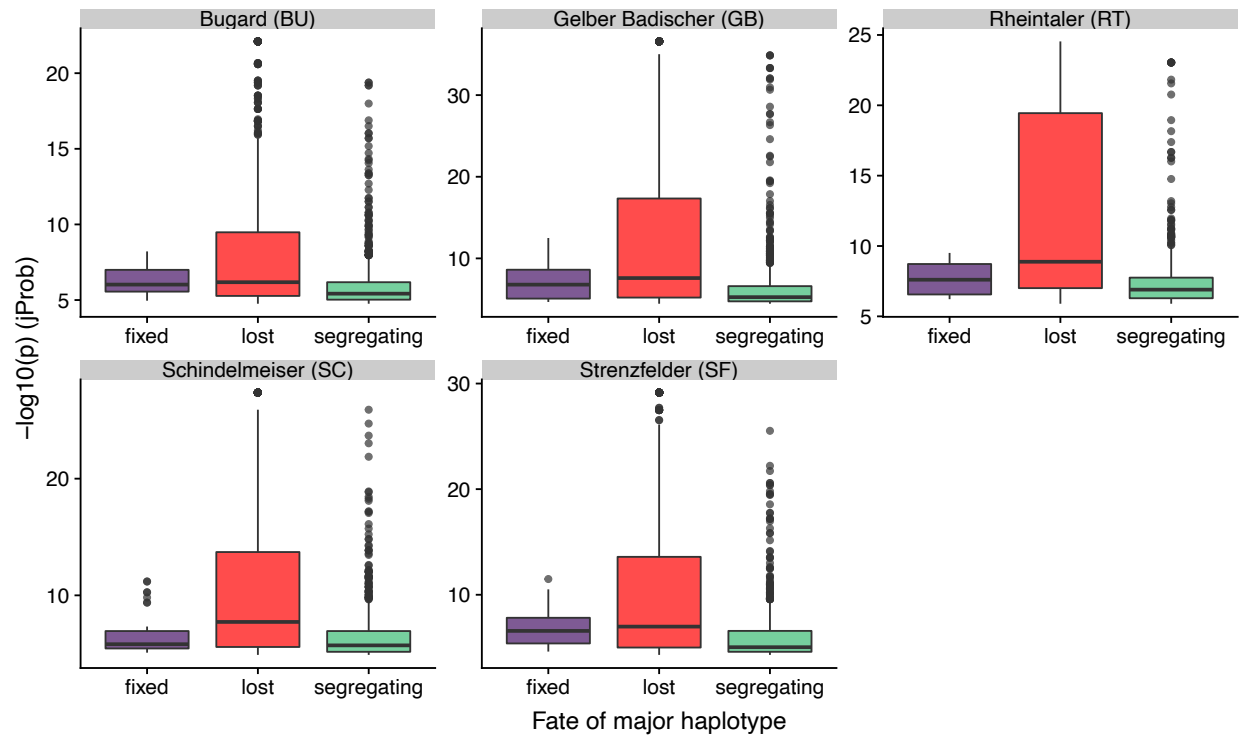

**Figure S14** Fate of major haplotypes in 50kb windows outliers from the joint probability test reveal the highest significance levels for outlier in regions with large scale losses of haplotypes.



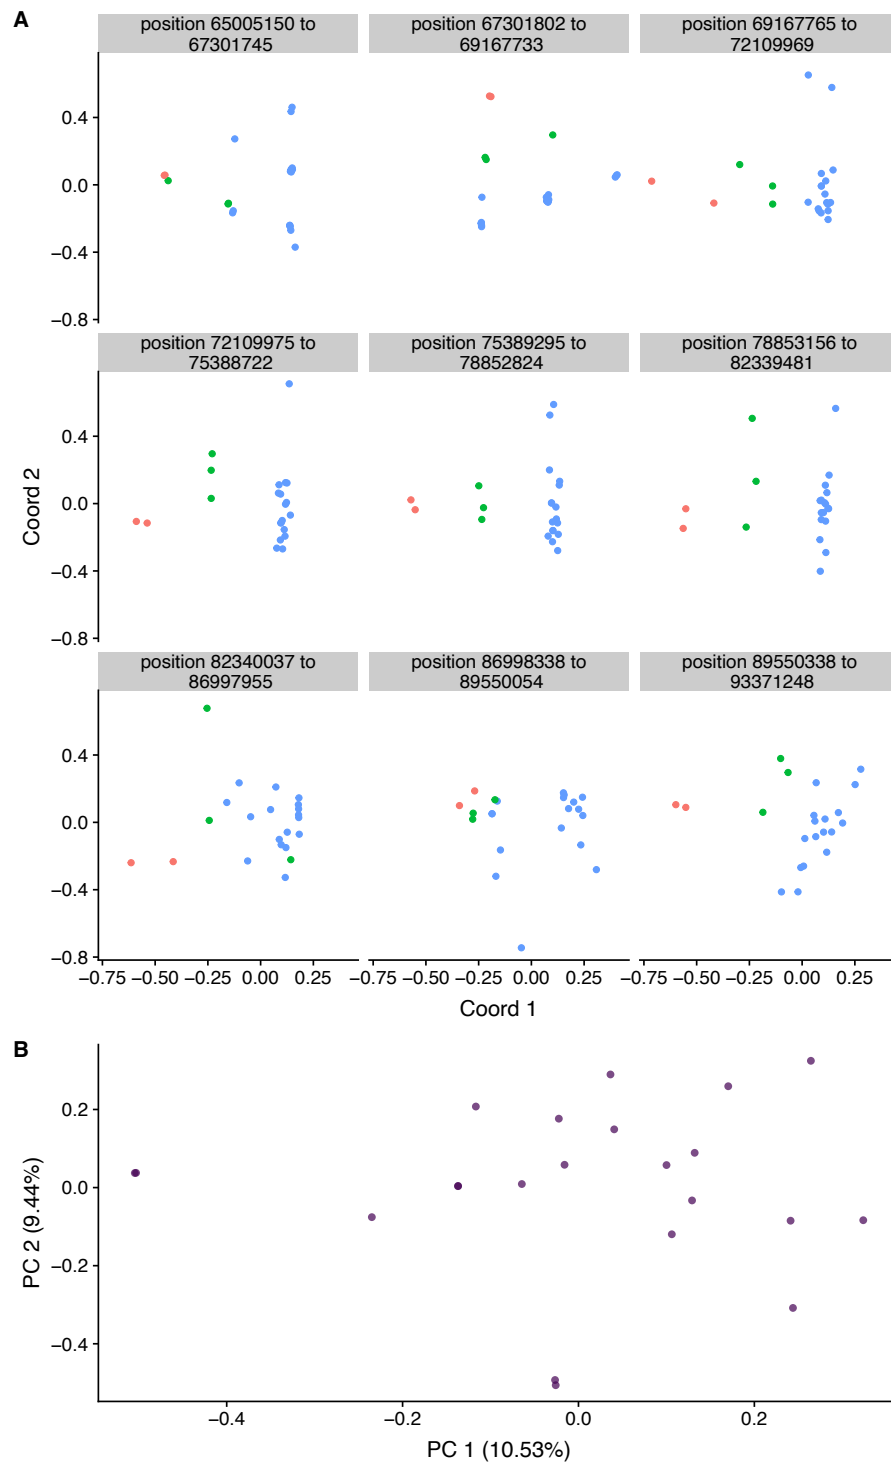

**Figure S15** (A) Local PCA (500 SNPs per window) reveals structural variation in multiple consecutive windows (chromosome 3, start positions 72,109,975; 75,389,295; 78,853,156) in putative inversion region of accession BU. Facet labels correspond to window start positions. Each windowed PCA was computed using 500 SNPs of the 600k LR BU dataset. Color codes refer to 3 clusters observed in window 72,109,975 to track clustering patterns in adjacent windows. (B) No structure is observed in principle components computed for genome-wide 600k data of accession BU (LR).

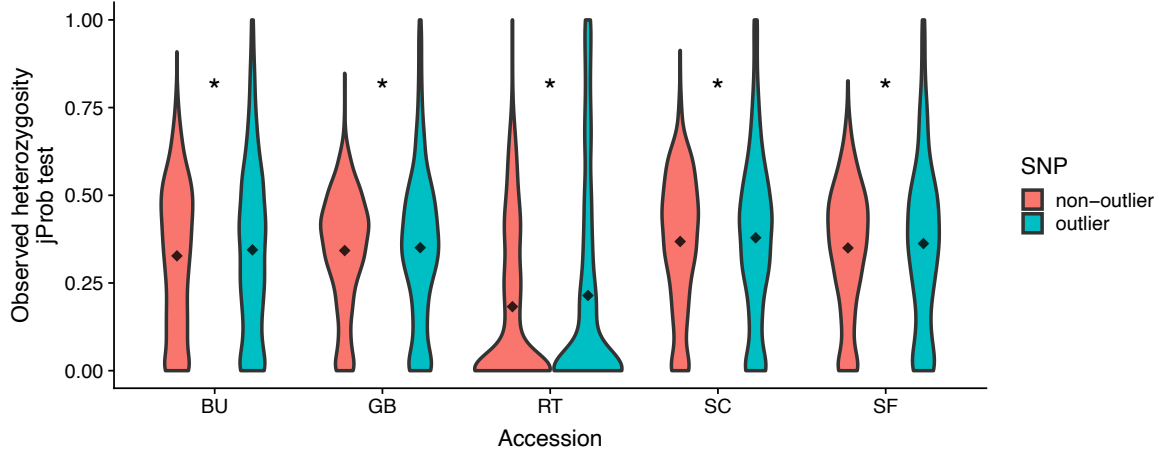

**Figure S16** Violin plots for the frequencies of heterozygous genotypes of LD-pruned non-outlier SNPs and outlier SNPs in LR accessions for joint probability outlier. Diamonds indicate group means. Comparisons with asterisks have significantly different means ( $p < 0.05$ ).

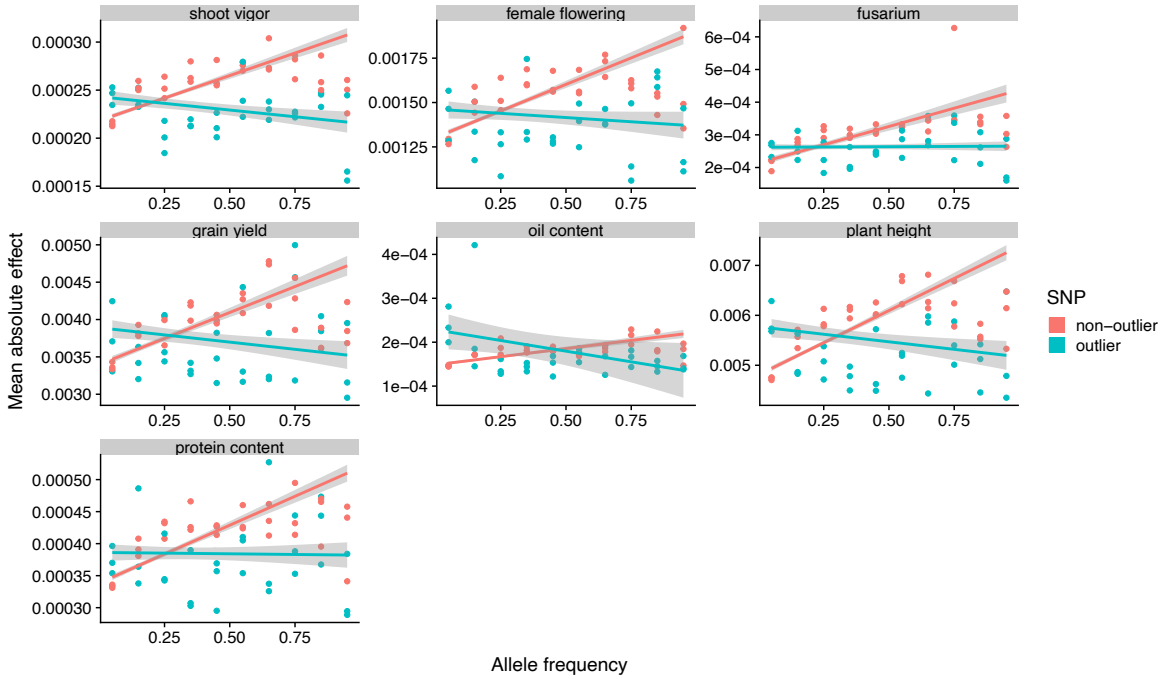

**Figure S17** Comparison of mean absolute effect sizes ( $\alpha$ ) for outliers and non-outliers in different frequency bins in three populations used in GWAS. By fitting a linear regression model ( $|\alpha| \sim \bar{p}_{bin}$ ) for fitness-related traits and outlier status we explore significant interactions in ANOVA (Table S6) between outlier status and frequency bin. Regression slopes with different signs highlight the deleterious action of outlier SNPs. Shaded areas around regression lines are 95% confidence intervals.

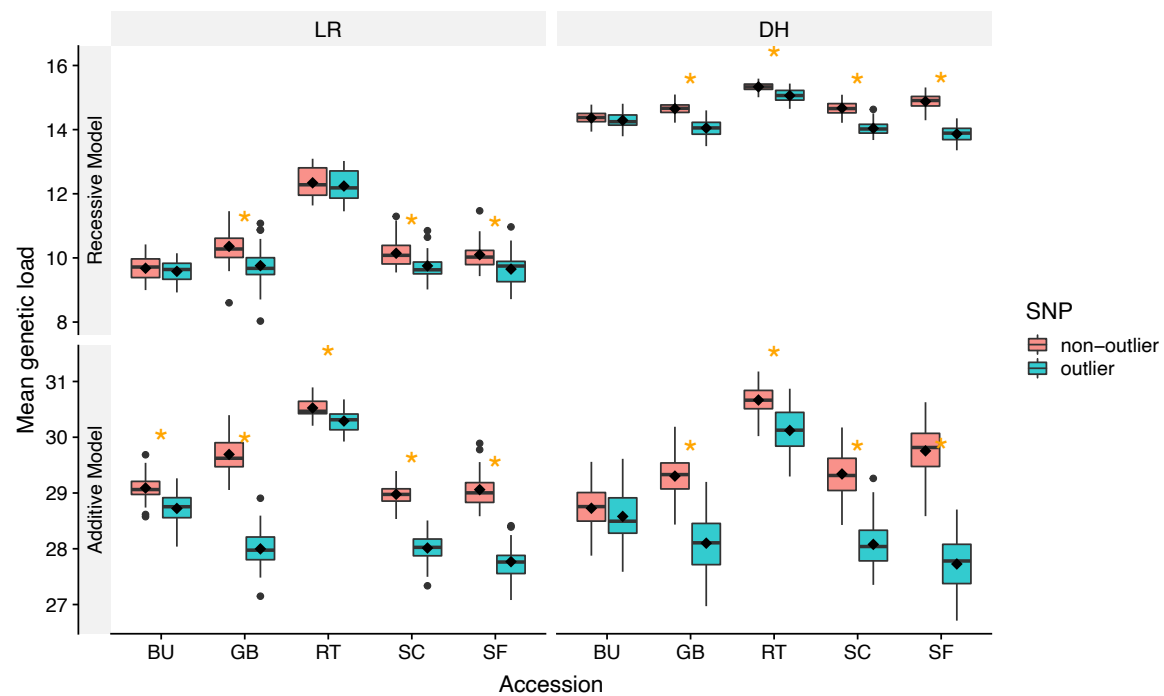

**Figure S18** Mean individuals' GERP sum in 1 cM region for SNPs with GERP > 0 per DH-LR pair and SNP-type reveal differences in putative genetic load comprised within accessions and populations for the additive and recessive model. Group means are represented by diamonds. Orange asterisks mean significantly different outlier/non-outlier means within accession and population (t-test,  $p < 0.05$ ).
